# Supplementary material
Source: publisher figshare collection journal article supplement (https://sage.figshare.com/ndownloader/files/18737168)
Supplement: Supplementary file 1 [file 18737168]

**(Online only) Supplemental Table A**

Key Terms for the Path Coefficients Used to Describe the Direct, Indirect, and Total Effects

| *c’* | Direct effect  WA 🡪 ENGAGE |
| --- | --- |
| *a*1*b*1 | Specific indirect effect  WA 🡪 AUTON 🡪 ENGAGE |
| *a*2*b*2 | WA 🡪 COMP 🡪 ENGAGE |
| *a*3*b*3 | WA 🡪 OE 🡪 ENGAGE |
| *a*1*d*21*b*2 | WA 🡪 AUTON 🡪 COMP 🡪 ENGAGE |
| *a*1*d*31*b*3 | WA 🡪 AUTON 🡪 OE 🡪 ENGAGE |
| *a*2*d*32*b*3 | WA 🡪 COMP 🡪 OE 🡪 ENGAGE |
| *a*1*d*21*d*32*b*3 | WA 🡪 AUTON 🡪 COMP 🡪 OE 🡪 ENGAGE |
| *c* | Total effect  *= c’* +  *a*1*b*1+*a*2*b*2 + *a*3*b*3 +*a*1*d*21*b*2 +*a*1*d*31*b*3 + *a*2*d*32*b*3 + *a*1*d*21 *d*32*b*3 |

*Note*. WA = Working Alliance; AUTON =Autonomous Motivation; COMP = Competency;

OE = Outcome Expectation; and ENGAGE = Transition-VR Engagement.

**(Online only) Supplemental Table B**

Regression Coefficients, Standard Errors, and Model Summary for the Serial Multiple Mediator Model Depicted in Figure1

| *Consequent* | | | | | | | | | |
| --- | --- | --- | --- | --- | --- | --- | --- | --- | --- |
| Antecedent |  | *M*1 (AUTON) | | *M*2 (COMP) | | *M*3 (OE) |  | Y (ENGAGE) | |
| Full Model |  |  |  |  |  |  |  |  |  |
| *X* (WA) | *a*1 | .40** (.10) | *a*2 | .46** (.09) | *a*3 | .40** (.10) | *c’* | .16 (.11) |  |
| *M*1 (AUTON) | | – | *d21* | .33** (.09) | *d31* | .19 (.11) | *b*1 | .10 (.11) |  |
| *M*2 (COMP) | | – |  | – | *d32* | .21 (.12) | *b*2 | .30* (.12) |  |
| *M*3 (OE) |  | – |  | – | – |  | *b*3 | .19 (.11) |  |
| Constant | *iM*1 | .00 (.10) | *iM*2 | .00 (.08) | *iM*3 | .00 (.09) | *iY* | .00 (.09) |  |
|  | *R*2 = .16** |  | *R*2 = .45** |  | *R*2 = .33** |  | *R*2 = .37** |  |  |
|  |  |  |  |  |  |  |  |  |  |
| Simple Models | |  |  |  |  |  |  |  |  |
| *X* (WA) | *a*1 | .40** (.10) |  | – |  | – | *c’* | .38** (.10) | *R*2 = .28** |
| *M*1 (AUTON) | | – |  | – |  | – | *b*1 | .25* (.10) |  |
| Constant | *iM*1 | .00 (.10) |  | – |  | – | *iY* | .00 (.09) |  |
|  |  |  |  |  |  |  |  |  |  |
| *X* (WA) | *a*1 | – | *a*2 | .60** (.09) |  | – | *c’* | .24* (.11) | *R*2 = .33** |
| *M*2 (COMP) |  | – |  | – |  | – | *b*2 | .40** (.11) |  |
| Constant | *iM*1 | – | *iM*2 | -.00 (.09) |  | – | *iY* | .00 (.09) |  |
|  |  |  |  |  |  |  |  |  |  |
| *X* (WA) | *a*1 | – |  | – | *a*3 | .49** (.09) | *c’* | .33** (.10) | *R*2 = .29** |
| *M*3 (OE) |  | – |  | – |  | – | *b*3 | .30** (.10) |  |
| Constant | *iM*1 | – | *iM*2 | – | *iM*3 | .00 (.09) | *iY* | .00 (.09) |  |

*Note*. WA = Working Alliance; AUTON =Autonomous Motivation; COMP = Competency; OE = Outcome Expectation; and ENGAGE = Transition-VR Engagement.
